# Supplementary material for: Metabolic Changes of Amino Acids and Flavonoids in Tea Plants in Response to Inorganic Phosphate Limitation
Source: PubMed Central journal article supplement (PMC6274676; doi:10.3390/ijms19113683), 2018-11-21
Supplement: ijms-19-03683-s001.pdf [file ijms-19-03683-s001.pdf]

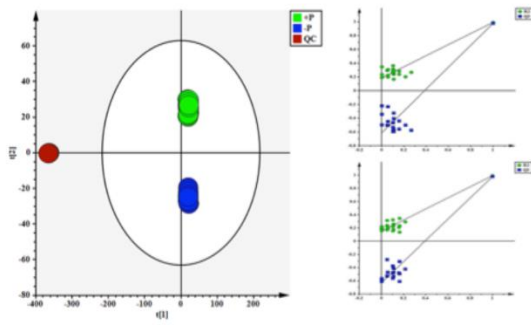

Unsupervised OPLS-DA and Permutations test of Primary Metabolites

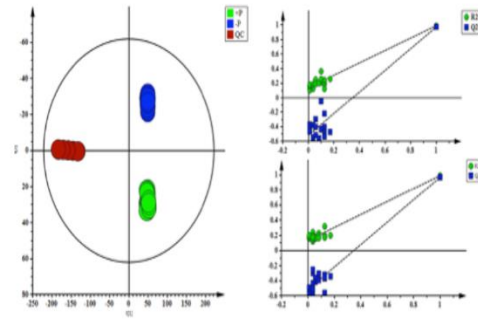

Supervised OPLS-DA and Permutations test of Primary Metabolites

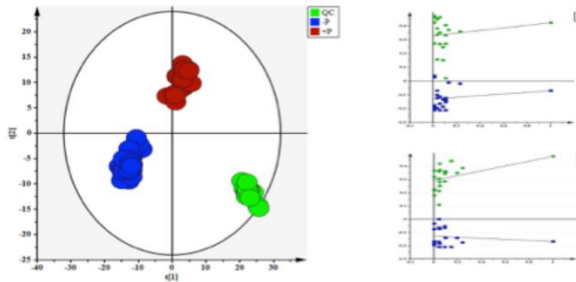

Unsupervised OPLS-DA and Permutations test of Secondary Metabolites

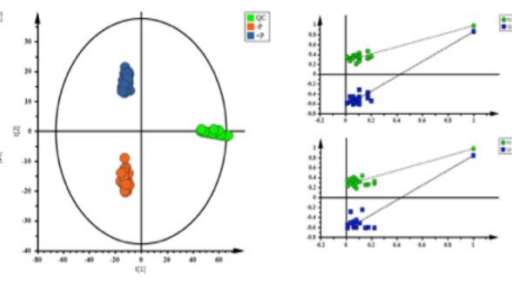

Supervised OPLS-DA and Permutations test of Secondary Metabolites

Figure S1. Supervised and unsupervised OPLS-DA and permutations test, with variables phosphate starvation (-P) and phosphate sufficient (+P) samples. Score plot and permutations sequencing tests of metabolites analysed by GC/GC-TOF/MS and UPLC-Q-TOF/MS in Fengqing and Longjing-43 cultivar. Test for Quality control (QC), -P and +P

Table S1. Fold changes ( $\log_2^{[-P/+P]}$ ) and *t-test* of selected metabolites in tea plant organs in response to P limitation measured by GC×GC-TOF/MS

| Class                     | Compound                          | Mass | 1st DT (minutes) | 2nd DT (seconds) | VIP           | Young Shoot $\log_2^{[-P/+P]}$ |                         |               |                         | Leaves $\log_2^{[-P/+P]}$ |                         |               |                         | Root $\log_2^{[-P/+P]}$ |                         |              |                         |
|---------------------------|-----------------------------------|------|------------------|------------------|---------------|--------------------------------|-------------------------|---------------|-------------------------|---------------------------|-------------------------|---------------|-------------------------|-------------------------|-------------------------|--------------|-------------------------|
|                           |                                   |      |                  |                  |               | Fengqing                       | <i>P-value (t-test)</i> | Longjing-43   | <i>P-value (t-test)</i> | Fengqing                  | <i>P-value (t-test)</i> | Longjing-43   | <i>P-value (t-test)</i> | Fengqing                | <i>P-value (t-test)</i> | Longjing-43  | <i>P-value (t-test)</i> |
| Phosphates                | D-Mannose 1 phosphate             | 387  | 19.6             | 2.22             | 1.90326       | 1.04                           | <0.001                  | 0.75          | <0.001                  | <b>-29.45</b>             | <0.01                   | <b>-26.52</b> | <0.001                  | -0.73                   | <0.001                  | -0.33        | <0.001                  |
|                           | Fructose 6-phosphate              | 315  | 33.3             | 0.01             | 1.39642       | <b>-30.89</b>                  | <0.01                   | <b>27.12</b>  | <0.001                  | 1.36                      | <0.001                  | 0.15          | NS                      | -1.41                   | <0.001                  | -0.16        | <0.001                  |
|                           | Glucose-6-Phosphate               | 387  | 23.8             | 0.04             | 1.90992       | <b>-6.79</b>                   | <0.001                  | <b>5.5</b>    | <0.001                  | 0.45                      | <0.05                   | 0.65          | <0.01                   | -0.21                   | <0.001                  | -1.91        | <0.001                  |
|                           | D-Myo-Inositol 1 phosphate        | 259  | 33.5             | 1.86             | 1.38598       | <b>27.36</b>                   | <0.05                   | <b>26.44</b>  | <0.05                   | <b>-0.48</b>              | <0.001                  | <b>-0.35</b>  | <0.01                   | -1.68                   | <0.001                  | -0.56        | <0.001                  |
|                           | D-Erythro-Pentofuranose phosphate | 211  | 31.5             | 2.82             | 1.12797       | <b>32.59</b>                   | <0.001                  | <b>0.15</b>   | <0.001                  | -0.84                     | <0.05                   | 0.26          | <0.001                  | 0.44                    | <0.001                  | 0.71         | <0.001                  |
| Sugars                    | Fructose                          | 305  | 33.3             | 0.03             | 1.84388       | -0.37                          | <0.01                   | -0.15         | <0.05                   | <b>24.72</b>              | <0.05                   | <b>25.6</b>   | <0.01                   | 0.19                    | <0.001                  | 0.09         | <0.001                  |
|                           | Glucose                           | 287  | 28.8             | 2.32             | 1.75573       | 0.95                           | <0.001                  | 0.11          | NS                      | <b>24.75</b>              | <0.001                  | <b>25.82</b>  | <0.001                  | 3.21                    | <0.001                  | 0.98         | <0.001                  |
|                           | D-Xylose                          | 204  | 21.5             | 0.04             | 1.75318       | <b>3.65</b>                    | <0.001                  | <b>3.51</b>   | <0.001                  | -0.56                     | <0.01                   | -0.77         | <0.001                  | 1.03                    | <0.001                  | 2.11         | <0.001                  |
|                           | Gluconate                         | 174  | 35               | 2.1              | 1.23656       | 0.23                           | <0.05                   | 0.11          | NS                      | 3.07                      | <0.001                  | 0.23          | <0.05                   | <b>2.25</b>             | <0.001                  | <b>3.24</b>  | <0.001                  |
|                           | Ribose                            | 50   | 8.4              | 1.4              | 1.61528       | <b>27.62</b>                   | <0.001                  | <b>30.33</b>  | <0.001                  | -0.01                     | NS                      | -0.76         | <0.001                  | 2.5                     | <0.001                  | A/P          | -                       |
|                           | Mannose                           | 205  | 23.2             | 2.35             | 1.37363       | <b>3.01</b>                    | <0.001                  | <b>27.33</b>  | <0.001                  | 0.56                      | <0.001                  | 0.13          | NS                      | -0.45                   | <0.001                  | -1.17        | <0.001                  |
|                           | 4-Ketoglucose                     | 232  | 21.7             | 2.92             | 1.24563       | <b>27.49</b>                   | <0.001                  | <b>3.77</b>   | <0.001                  | -1.01                     | <0.001                  | 0.6           | <0.001                  | 3.62                    | <0.001                  | -0.54        | <0.001                  |
| Myo-Inositol              | 44                                | 37.2 | 1.4              | 1.27525          | <b>-28.46</b> | <0.01                          | <b>-27.53</b>           | <0.01         | 1.42                    | <0.05                     | -0.07                   | <0.001        | 3.04                    | <0.001                  | -0.07                   | <0.001       |                         |
| Amino Acids & N compounds | Threonine                         | 209  | 21.5             | 0.05             | 1.65724       | <b>-26.72</b>                  | <0.05                   | <b>24.66</b>  | <0.001                  | <b>23.1</b>               | <0.01                   | <b>22.98</b>  | <0.01                   | -0.28                   | <0.001                  | -1.49        | <0.001                  |
|                           | Hydroxyproline                    | 230  | 6.3              | 0.05             | 1.36545       | -0.32                          | <0.01                   | -0.77         | <0.001                  | <b>26.83</b>              | <0.01                   | <b>23.65</b>  | <0.01                   | 0.32                    | <0.001                  | 1.4          | <0.001                  |
|                           | Phenylalanine                     | 244  | 8.3              | 0.02             | 1.27286       | 0.6                            | <0.001                  | -0.63         | <0.01                   | -2.54                     | <0.001                  | 0.5           | <0.001                  | <b>2.6</b>              | <0.001                  | <b>4.63</b>  | <0.001                  |
|                           | Asparagine                        | 159  | 18               | 0.04             | 1.65589       | -0.74                          | <0.05                   | -0.27         | <0.001                  | P/A                       | -                       | -24.11        | <0.01                   | -0.34                   | <0.001                  | -3.59        | <0.001                  |
|                           | Ethanolamine                      | 220  | 30.8             | 0.06             | 1.27224       | 0.9                            | <0.001                  | 0.37          | <0.001                  | <b>-4.56</b>              | <0.001                  | <b>-27.05</b> | <0.001                  | 0.49                    | <0.001                  | -0.16        | <0.001                  |
|                           | Alanine                           | 30   | 15.5             | 0.02             | 1.68114       | 0.44                           | <0.001                  | -0.87         | <0.001                  | 1                         | <0.001                  | 0.2           | <0.05                   | <b>16.89</b>            | <0.001                  | <b>19.71</b> | <0.001                  |
|                           | Tryptophan                        | 202  | 36.1             | 0.05             | 1.25853       | 1.08                           | <0.001                  | 0.55          | <0.05                   | 0.42                      | <0.05                   | 0.44          | <0.001                  | <b>5.22</b>             | <0.001                  | <b>22.85</b> | <0.001                  |
|                           | Tyrosine                          | 180  | 26.5             | 0.05             | 1.12788       | -2.98                          | <0.05                   | 3.11          | <0.001                  | -3.09                     | <0.001                  | 0.36          | <0.01                   | <b>4.41</b>             | <0.001                  | <b>9.52</b>  | <0.001                  |
|                           | Isoleucine                        | 159  | 21.5             | 0.05             | 1.66455       | <b>27.35</b>                   | <0.001                  | <b>25.13</b>  | <0.05                   | -0.72                     | <0.001                  | -0.05         | NS                      | 2.8                     | <0.001                  | -0.55        | <0.001                  |
|                           | Proline                           | 243  | 6.3              | 0.05             | 1.41583       | <b>32.75</b>                   | <0.001                  | <b>30.02</b>  | <0.05                   | -0.46                     | <0.001                  | -0.87         | <0.05                   | -0.98                   | <0.001                  | -1.94        | <0.001                  |
|                           | Glycine                           | 178  | 36.8             | 0.04             | 1.35468       | <b>-1.84</b>                   | <0.001                  | <b>-25.43</b> | <0.001                  | 1.23                      | <0.001                  | -0.41         | <0.001                  | 0.63                    | <0.001                  | -1.68        | <0.001                  |
|                           | Leucine                           | 95   | 5.7              | 0.06             | 1.59664       | <b>-29.87</b>                  | <0.01                   | <b>-28.68</b> | <0.05                   | -0.62                     | <0.001                  | 0.19          | <0.01                   | 1.96                    | <0.001                  | 2.2          | <0.001                  |
|                           | Glutamine                         | 46   | 21.5             | 0.05             | 1.52591       | -0.49                          | <0.05                   | 1.12          | <0.01                   | 0.13                      | <0.001                  | -1.46         | <0.001                  | -0.19                   | <0.001                  | 0.98         | <0.001                  |
| Serine                    | 73                                | 12.6 | 0.03             | 1.14362          | -0.73         | <0.05                          | 0.25                    | <0.01         | 1.23                    | <0.05                     | -0.48                   | NS            | -0.62                   | <0.01                   | -1.71                   | <0.001       |                         |
| Methionine                | 115                               | 21.5 | 0.05             | 1.35569          | 0.13          | <0.01                          | -1.46                   | <0.001        | <b>5.89</b>             | <0.01                     | <b>3.32</b>             | <0.001        | 0.56                    | <0.01                   | 0.65                    | <0.001       |                         |

|              |                      |     |      |      |         |              |        |              |        |              |        |               |        |              |        |             |        |
|--------------|----------------------|-----|------|------|---------|--------------|--------|--------------|--------|--------------|--------|---------------|--------|--------------|--------|-------------|--------|
|              | Glutamate            | 98  | 8.8  | 2    | 1.32546 | 0.79         | <0.001 | -1.55        | <0.001 | 1.07         | <0.001 | -0.8          | <0.001 | -1.08        | <0.001 | -2.57       | <0.001 |
|              | Glutamic acid        | 46  | 17   | 0.04 | 1.23145 | 0.95         | <0.001 | -0.63        | <0.05  | 0.56         | <0.01  | 0.13          | <0.001 | 1.06         | <0.001 | 1.3         | <0.001 |
|              | Glutaric acid        | 230 | 17   | 2.39 | 1.32532 | 0.91         | <0.001 | -0.06        | <0.01  | -0.53        | <0.01  | 1.23          | <0.01  | -1.08        | <0.001 | -0.74       | <0.001 |
|              | Lysine               | 46  | 7.6  | 1.75 | 1.09621 | -0.81        | <0.001 | -1.62        | <0.05  | -0.63        | <0.01  | -0.38         | <0.01  | -1.45        | <0.001 | -0.23       | <0.001 |
|              | Ornithine            | 70  | 21.4 | 2.52 | 1.23614 | -1.41        | <0.001 | -2.81        | <0.001 | -0.47        | <0.001 | 0.18          | NS     | -2.63        | <0.001 | 3.09        | <0.001 |
|              | Valine               | 207 | 10   | 1.8  | 1.22545 | -0.37        | <0.01  | -0.76        | <0.001 | -0.82        | <0.001 | -             | -      | -0.12        | <0.001 | 1.45        | <0.01  |
| Organic acid | Butanoic acid        | 315 | 18.9 | 0.07 | 1.09515 | 1.07         | <0.001 | -1.07        | <0.01  | <b>21.51</b> | <0.01  | <b>26.77</b>  | <0.05  | -0.23        | <0.001 | -2.4        | <0.001 |
|              | Pyruvate             | 50  | 7.9  | 1.4  | 1.32564 | -0.08        | <0.05  | -0.04        | <0.05  | <b>6.64</b>  | <0.001 | <b>24.76</b>  | <0.01  | <b>-2.04</b> | <0.001 | <b>-2.4</b> | <0.001 |
|              | Benzenebutanoic acid | 98  | 21.5 | 0.05 | 1.33264 | -0.74        | <0.01  | -0.94        | <0.05  | P/A          | -      | 24.11         | <0.01  | -3.09        | <0.001 | 1.55        | <0.001 |
|              | Pentanedioic acid    | 158 | 13   | 2.13 | 1.12749 | 0.86         | <0.001 | -1.63        | <0.001 | <b>-27.9</b> | <0.001 | <b>-27.73</b> | <0.001 | 0.86         | <0.001 | 0.52        | <0.001 |
|              | 2-ketoglutarate      | 173 | 22.3 | 2.99 | 1.20838 | <b>26.14</b> | <0.001 | <b>27.16</b> | <0.001 | 0.47         | <0.05  | -0.28         | <0.05  | 1.96         | <0.001 | 2.11        | <0.001 |

'NS' indicates not significant ( $p < 0.005$ ) differences between P treatments.

Table S2. Fold changes ( $\log_2^{[-P/+P]}$ ) and *t*-test of selected metabolites in tea plant organs in response to P limitation measured by UPLC-Q-TOF/MS

| Class                               | Compound                                      | Monoisotopic Mass        | Retention Time | Adduct         | VIP         | Young Shoot $\log_2^{[-P/+P]}$ |                                   |              |                                   | Leaves $\log_2^{[-P/+P]}$ |                                   |              |                                   | Root $\log_2^{[-P/+P]}$ |                                   |              |                                   | iC    |
|-------------------------------------|-----------------------------------------------|--------------------------|----------------|----------------|-------------|--------------------------------|-----------------------------------|--------------|-----------------------------------|---------------------------|-----------------------------------|--------------|-----------------------------------|-------------------------|-----------------------------------|--------------|-----------------------------------|-------|
|                                     |                                               |                          |                |                |             | Fengqing                       | <i>P</i> -value ( <i>t</i> -test) | Longjing-43  | <i>P</i> -value ( <i>t</i> -test) | Fengqing                  | <i>P</i> -value ( <i>t</i> -test) | Longjing-43  | <i>P</i> -value ( <i>t</i> -test) | Fengqing                | <i>P</i> -value ( <i>t</i> -test) | Longjing-43  | <i>P</i> -value ( <i>t</i> -test) |       |
| Flavonoids                          | Luteolin-7-O-glucoside                        | 448.1005615              | 4.96           | M-H2O-H        | 1.07890     | <b>24.9</b>                    | <0.001                            | -            | <0.001                            | <b>13.99</b>              | <0.001                            | <b>13.08</b> | <0.001                            | <b>0.43</b>             | NS                                | <b>2.06</b>  | <0.01                             | (i)   |
|                                     | Delphinidin                                   | 337.0149                 | 3.9            | M-H            | 1.21593     | <b>0.87</b>                    | <0.05                             | <b>2.25</b>  | <0.001                            | <b>12.16</b>              | <0.001                            | <b>1.42</b>  | <0.001                            | P/A                     | -                                 | P/A          | -                                 | (iii) |
|                                     | Cyanidin                                      | 286.0477381              | 3.16           | M+NA-2H/M+FA-H | 1.28302     | <b>1.81</b>                    | <0.001                            | <b>2.96</b>  | <0.001                            | A/P                       | -                                 | <b>15.07</b> | NS                                | P/A                     | -                                 | P/A          | -                                 | (iii) |
|                                     | Epigallocatechin                              | 306.0739528              | 2.72           | M+FA-H         | 1.42885     | P/A                            | -                                 | <b>-14.8</b> | <0.001                            | A/P                       | -                                 | <b>21.54</b> | <0.001                            | P/A                     | -                                 | A/P          | -                                 | (i)   |
|                                     | Rutin                                         | 610.1533849              | 4.5            | M-H2O-H        | 1.56987     | <b>3.53</b>                    | <0.001                            | <b>-1.17</b> | <0.001                            | <b>0.12</b>               | <0.01                             | <b>15.73</b> | <0.001                            | 16.88                   | <0.001                            | -            | -                                 | (i)   |
|                                     | Isoquercitrin                                 | 464.0954761              | 4.85           | M-H            | 1.54177     | <b>17.93</b>                   | <0.001                            | <b>7.04</b>  | <0.001                            | <b>14.15</b>              | <0.05                             | <b>0.51</b>  | <0.01                             | -                       | -                                 | -15.2        | <0.001                            | (i)   |
|                                     | Procyanidin B1                                | 578.1424263              | 2.62           | M-H2O-H        | 1.55174     | <b>-4</b>                      | <0.001                            | <b>-2.08</b> | <0.001                            | <b>9.48</b>               | <0.001                            | A/P          | -                                 | 14.15                   | <0.001                            | 0.11         | <0.05                             | (i)   |
|                                     | Kaempferol-3-O-glucoside                      | 448.1006                 | 5.88           | M-H            | 1.09133     | <b>15.07</b>                   | <0.001                            | <b>-1.93</b> | <0.001                            | 0                         | -                                 | -6.23        | <0.001                            | -1.89                   | <0.01                             | -0.33        | <0.05                             | (i)   |
|                                     | Quercetin-3,4'-diglucoside                    | 324.1144                 | 3.9            | M-H2O-H        | 1.28735     | 0.87                           | <0.05                             | 2.25         | <0.001                            | -12.16                    | <0.05                             | P/A          | -                                 | 0.66                    | <0.01                             | -0.11        | <0.001                            | (i)   |
|                                     | Epiafzelechin-epicatechin 3,3'-digallate      | 887.148                  | 6.83           | M-H2O-H        | 1.73042     | <b>8.41</b>                    | <0.05                             | <b>3.05</b>  | <0.001                            | 0.5                       | <0.05                             | -8.85        | <0.001                            | 1.93                    | <0.01                             | 15.42        | <0.001                            | (iii) |
|                                     | Diosmetin 7-O-beta-D-glucuronopyranoside      | 476.095476104/1048.37584 | 2.99           | M-H2O-H        | 1.07112     | -0.13                          | <0.05                             | -0.74        | <0.001                            | 0.93                      | <0.001                            | 0.12         | <0.01                             | <b>13.17</b>            | <0.001                            | <b>17.78</b> | <0.001                            | (iii) |
|                                     | Kaempferol 3-β-d-glucopyranoside              | 448.1006                 | 5.53           | M-H, M+Na-2H   | 1.53710     | <b>5.19</b>                    | <0.001                            | 0.08         | <0.001                            | <b>-1.7</b>               | <0.05                             | <b>-3.11</b> | <0.001                            | 0.57                    | <0.05                             | 20.07        | <0.05                             | (i)   |
|                                     | Tricin 7-glucuronide                          | 1034.217561              | 3.83           | M-2H, M-H      | 1.29161     | 2.4                            | <0.001                            | -0.81        | <0.001                            | -0.47                     | <0.05                             | -0.76        | <0.01                             | 16.17                   | <0.001                            | 0.28         | <0.05                             | (iii) |
|                                     | Prunin 6"-p-coumarate                         | 580.1580764              | 2.97           | M-H2O-H        | 1.07112     | -1.06                          | <0.01                             | -2           | <0.001                            | -0.14                     | <0.05                             | 0.17         | <0.05                             | 18.12                   | <0.01                             | 18.98        | <0.001                            | (i)   |
|                                     | Quercetin 3-glucoside                         | 934.2379024              | 4              | M-H            | 1.55270     | <b>4.34</b>                    | <0.001                            | <b>2.02</b>  | <0.001                            | 0.2                       | <0.05                             | 0.38         | <0.05                             | 0.25                    | <0.05                             | -0.72        | <0.05                             | (iii) |
|                                     | Quercetin -(2"-galloyl-α-L-arabinopyranoside) | 586.09587                | 4.25           | M+FA-H         | 1.73065     | <b>15.61</b>                   | <0.001                            | <b>3.11</b>  | <0.001                            | -0.66                     | <0.05                             | -0.42        | <0.05                             | 0.96                    | <0.05                             | 0.94         | <0.05                             | (iii) |
|                                     | Catechin                                      | 289.0741                 | 2.38           | M-H            | 1.46300     | <b>1.14</b>                    | <0.01                             | <b>0.99</b>  | <0.001                            | 1.04                      | <0.05                             | 0.91         | <0.001                            | 1.05                    | <0.05                             | 1.54         | <0.05                             | (iii) |
|                                     | Epigallocatechin gallate                      | 457.0828                 | 2.99           | M-H            | 1.07112     | <b>1</b>                       | <0.01                             | <b>0.96</b>  | <0.001                            | <b>1.18</b>               | <0.05                             | <b>1.02</b>  | <0.001                            | <b>0.49</b>             | <0.05                             | <b>0.81</b>  | <0.05                             | (iii) |
|                                     | Kaempferol 3-sophoroside 7-glucuronide        | 786.1854729              | 2.15           | M+FA-H         | 1.19289     | <b>-15.21</b>                  | <0.001                            | <b>-0.41</b> | <0.001                            | -2.48                     | <0.01                             | 0.96         | <0.01                             | -0.38                   | <0.05                             | -0.35        | <0.05                             | (iii) |
|                                     | Quercetin-3-sulfate                           | 381.9994672              | 4.5            | M+Na-2H        | 1.07434     | -1.43                          | <0.001                            | -0.28        | <0.001                            | 0.28                      | <0.05                             | -0.19        | NS                                | -1.34                   | <0.05                             | -17.02       | <0.05                             | (ii)  |
| (-)-Epigallocatechin 3,3'-digallate | 610.095870034/631.0705                        | 5.82                     | M-H/M+Na-2H    | 1.73042        | <b>3.27</b> | <0.05                          | <b>-2.28</b>                      | <0.001       | 0.15                              | <0.05                     | -3.32                             | <0.001       | 2.61                              | <0.01                   | 7.44                              | <0.05        | (iii)                             |       |
| Prunin 6"-O-gallate                 | 586.1322555                                   | 5.69                     | M-H2O-H        | 1.41871        | <b>3.99</b> | <0.01                          | <b>1.51</b>                       | <0.001       | <b>-3.23</b>                      | <0.05                     | <b>-1.43</b>                      | <0.001       | -0.35                             | <0.05                   | -                                 | -            | (iii)                             |       |

|               |                                           |                           |      |                         |         |              |        |               |        |               |        |              |        |              |        |              |        |       |
|---------------|-------------------------------------------|---------------------------|------|-------------------------|---------|--------------|--------|---------------|--------|---------------|--------|--------------|--------|--------------|--------|--------------|--------|-------|
|               | Gallocatechin                             | 306.0739528               | 2.04 | M-H2O-H                 | 1.41323 | <b>17.14</b> | <0.001 | <b>0.27</b>   | <0.001 | -1.87         | <0.001 | -0.07        | NS     | 1.28         | <0.001 | -0.52        | <0.05  | (i)   |
|               | Malvidin                                  | 330.047/<br>366.050630541 | 0.81 | M-H/M-<br>H2O-H         | 2.02670 | 0.42         | <0.05  | 0.07          | <0.001 | 0.06          | <0.05  | 0.46         | <0.01  | 1.56         | <0.05  | -            | -      | (iii) |
|               | Epicatechin                               | 207.0662/<br>290.07903818 | 3.32 | M-H2O-H                 | 1.34065 | P/A          | -      | -1.23         | <0.001 | -0.48         | <0.05  | 4.48         | <0.01  | -0.81        | <0.05  | 0.37         | <0.05  | (ii)  |
|               | (-)-Epiafzelechin 3-gallate               | 135.9791                  | 2.31 | (M-H2O-H,<br>M-H)       | 1.77701 | 2.16         | <0.01  | 0.19          | <0.001 | -0.81         | <0.05  | -0.23        | <0.01  | 3.64         | <0.01  | 6.13         | <0.01  | (iii) |
|               | Licorice glycoside A                      | 726.2159852               | 7.42 | M-H                     | 1.53554 | -1.55        | <0.05  | -6.23         | <0.001 | <b>2.96</b>   | <0.05  | <b>1.09</b>  | <0.05  | 0.32         | <0.05  | -22.17       | <0.05  | (iii) |
|               | Paratocarpin A                            | 388.1674593               | 3.44 | M-H                     | 1.93691 | 0.89         | <0.01  | -0.42         | <0.001 | -0.69         | <0.05  | -0.69        | <0.001 | 15.34        | <0.001 | 21.02        | <0.001 | (i)   |
| Chalcone      | 4'-Methoxychalcone                        | 534.1502                  | 2.62 | /M-H2O-H                | 1.66973 | <b>-4.42</b> | <0.05  | <b>-8.48</b>  | <0.001 | <b>-3.82</b>  | <0.001 | <b>-3.71</b> | <0.001 | -0.7         | <0.05  | -0.69        | <0.05  | (i)   |
|               | 4,2',4',alpha-tetrahydroxydihydrochalcone | 274.0841236               | 4.13 | M+Na-2H                 | 1.21483 | <b>-6.9</b>  | <0.001 | <b>-20.32</b> | <0.001 | -0.5          | <0.001 | 0.47         | <0.01  | -0.39        | <0.05  | 0.21         | <0.05  | (i)   |
| Benzenoids    | Gallic acid                               | 170.0215233               | 1.43 | M-H2O-H                 | 1.14956 | <b>8.36</b>  | <0.05  | <b>-2.57</b>  | <0.001 | -0.94         | <0.05  | -0.33        | <0.001 | 5.86         | <0.05  | -1.43        | <0.05  | (i)   |
|               | M-trigallic acid                          | 474.0434405               | 3.32 | M+Na-<br>2H/M-<br>H2O-H | 1.05172 | <b>2.33</b>  | <0.001 | <b>1.12</b>   | <0.001 | -15.07        | <0.001 | P/A          | -      | 0.77         | <0.05  | 1.76         | <0.05  | (i)   |
|               | 2,4-dihydroxybenzoic acid                 | 154.0266087               | 3.31 | M-H2O-H                 | 1.34065 | 0.28         | <0.05  | 0.2           | <0.001 | 0.32          | <0.05  | 0.55         | <0.001 | -17.42       | <0.001 | -14.81       | <0.05  | (ii)  |
|               | Catechol                                  | 110.0367794               | 3.06 | M-H2O-H                 | 1.33244 | 0.09         | <0.05  | -0.96         | <0.001 | <b>-10.96</b> | <0.001 | 0.68         | <0.001 | P/A          | -      | 0.56         | <0.05  | (i)   |
| Organic Acids | Quinic acid                               | 192.0633881               | 0.81 | M-H2O-H                 | 1.32319 | 1.23         | <0.001 | 1.04          | <0.001 | -0.46         | <0.05  | 1.06         | <0.001 | <b>14.48</b> | <0.001 | <b>2.08</b>  | <0.05  | (i)   |
|               | Shikimic acid                             | 174.0528234               | 3.43 | M-H                     | 1.33649 | -0.87        | <0.01  | 2.6           | <0.001 | 0.73          | <0.001 | 2.72         | <0.001 | <b>12.95</b> | <0.01  | <b>13.99</b> | <0.05  | (i)   |

'P/A' means a metabolite is detected in -P but absent in +P, or vice versa.

<sup>a</sup>Identification Category

(i) Actual Mass (AM), Retention Time and Standard

(ii) AM and RT

(iii) AM and Isotopic Distribution (ID)

Table S3. Transcription factor primer sequences for *cv. assamica* (Fengqing) and *cv. sinensis* (Longjing-43) for qRT-PCR analysis.

| <b>Transcription Factor</b>                                   | <b>Cultivar</b>     | <b>Gene Identifier</b> | <b>Forward primer (5'&gt;3')</b> | <b>Reverse Primer (5'&gt;3')</b> |
|---------------------------------------------------------------|---------------------|------------------------|----------------------------------|----------------------------------|
| <i>PHR1</i> (phospahte starvation response 1)                 | <i>cv. sinensis</i> | CL15435Contig1         | ATCTGCACAATGAACAGCACCAT          | GCTCCAAAGAGGCTTAGGATAGA          |
|                                                               | <i>cv. assamica</i> | CL69205Contig1         | CTGCCCAGAATCGGACAATAAGA          | AACGCAAACCTGAGAATCCTGAAATG       |
| <i>PHO1</i> (phosphate signal transduction 1)                 | <i>cv. sinensis</i> | CL27009Contig1         | TCGAGTCCTGGTAGGAAGAACCT          | GTTGATTATTGGCAACTCAAGAAAG        |
|                                                               | <i>cv. assamica</i> | CL39177Contig1         | ATCATCCCATACAAGTACAAGAATC        | CTAAATGTCCAAACTCCACCTAA          |
| <i>SPX2</i> (Pi transport, Pi stress, sensing and signalling) | <i>cv. sinensis</i> | CL117Contig2           | CAGGGTAGCAGAGGCTCGGGATT          | AGCACCGCTTCGCTTGTCTATT           |
|                                                               | <i>cv. assamica</i> | CL58020Contig1         | GCGGTGGCAACGAGAACTCACTC          | CTTCTTCGCTCGCCTTTCATTCA          |

Table S4. Primer sequences for the gene transcripts of *cv. assamica* (Fengqing) cultivar of selected pathways for qRT-PCR analysis.

| Pathway                                             | Reaction, Gene and Enzymatic activity                                      | Gene Identifier <i>cv. assamica</i> | Forward primer (5'>3')     | Reverse Primer (5'>3')      |
|-----------------------------------------------------|----------------------------------------------------------------------------|-------------------------------------|----------------------------|-----------------------------|
| Valine, Leucine and Isoleucine Biosynthesis         | Branch Chain Amino Transferease 1 (2.6.1.42, <i>BCAT1</i> )                | CL60167Contig1                      | GCCTTTGACATCCTTTGATTCTG    | GGAGCTTATCTTGCCTTCTTTTCG    |
| Phenylalanine, Tyrosine and Tryptophan biosynthesis | tryptophan synthase alpha chain ( <i>TSA1</i> , 4.2.1.20)                  | CL76112Contig1                      | ACATTTATCGGAAGGTCGCATTT    | TAACAAGTAAGCCTGTGGCAGTT     |
|                                                     | arogenate/ prephenate dehydrase ( <i>ADT1</i> , 4.2.1.51/4.2.1.91)         | CL49595Contig1                      | CAGCAGAACAGTGGCTATGGAAT    | TGAATGGAAGTAACCTCGAAGAAT    |
| Methionine Biosynthesis                             | methyltransferase (2.1.1.14, <i>MS2</i> )                                  | CL27145Contig1                      | CTCCAGTCACAAGCGTGTAGCCT    | GTCCTCGTTCTGGTCTCATCTTCTTTC |
| Alanine, asparate and glutamate biosynthesis        | Omega-amidase, chloroplast (3.5.1.111, <i>NPL3</i> )                       | CL69393Contig1                      | ACTATTCCATATTTTCAGGCAAGAC  | CCACTACCACCACCTATCCATCT     |
|                                                     | glutamate synthase (1.4.1.13/1.4.1.14, <i>GLT1</i> )                       | CL40912Contig1                      | TGTATGAGGAAGAAACCAGCAAC    | TAAAGACGGAGTATCCTAAAGGT     |
| Butanoate metabolism                                | acyl-CoA synthetase (6.2.1.2, <i>ACS</i> )                                 | CL45357Contig1                      | GCATAGGTGTTCGGAGTCTTTGAG   | GGAACCACTTGAGCGACCTTACT     |
| Arginine and Proline Biosynthesis                   | prolyl 4-hydroxylase (1.14.11.2, <i>P4H</i> )                              | CL35020Contig1                      | CAGTTTGCCAAATGAACTATCAAG   | TATGGTAGGCTCTGAAGGTGTAG     |
| Flavonoid Biosynthesis                              | anthocyanidin reductase (1.3.1.77, <i>ANR</i> )                            | CL2560Contig1                       | GGACTTCTTAGGTGGGATTTCTA    | AATCATCTGGCTGGCTTACTACA     |
|                                                     | leucoanthocyanidin dioxygenase (1.4.11.19, <i>LDOX</i> )                   | CL59191Contig1                      | TCCATACTCTTCTATCACTTCCCTAA | AGTAATCCGTGTTCAATCCTTGT     |
| Flavone and Flavonol Biosynthesis                   | glucosyltransferases (2.1.4.81, <i>UGT75L12</i> )                          | CL68486Contig1                      | ATCTACTGTTATGACATGGGCTTTA  | ATCTTACAATGGTGATTTGAGGG     |
|                                                     | flavonol 3-O-glucosyltransferase (2.4.1.91, <i>UGT78D2</i> )               | CL4384Contig1                       | TAATCATCGGAAGACAAGCACAT    | AAGGGTTGATAGTGAGGAGTTGG     |
|                                                     | flavonol-3-O-glucoside L-rhamnosyltransferase (2.4.1.159, <i>UGT78D1</i> ) | CL38490Contig1                      | GGTAGGTGAGTTGTGAAATCGCTGAA | GCTGGGCTCTTGGATGCTTCTTC     |

Table S5. Primer sequences for the gene transcripts of *cv. sinensis* (Longjing-43) cultivar of selected pathways and the reference was used for qRT-PCR analysis.

| Pathway                                             | Reaction, Gene and Enzymatic activity                                      | Gene Identifier <i>cv. sinensis</i> | Forward primer (5'>3')   | Reverse Primer (5'>3')    |
|-----------------------------------------------------|----------------------------------------------------------------------------|-------------------------------------|--------------------------|---------------------------|
| Valine, Leucine and Isoleucine Biosynthesis         | Branch Chain Amino Transferease 1 (2.6.1.42, <i>BCATI</i> )                | CL23657Contig1                      | TATGTTGTTGAGGAGGTTGTTGT  | GAAAGACTATCATCCCAGCCAGA   |
| Phenylalanine, Tyrosine and Tryptophan biosynthesis | tryptophan synthase alpha chain ( <i>TSAl</i> , 4.2.1.20)                  | CL5201Contig2                       | GCTCGTGTATCTGTAAGCGGAAAG | CACTATGGCACTACCAACAATCA   |
|                                                     | arogenate/ prephenate dehydrase ( <i>ADTI</i> , 4.2.1.51/4.2.1.91)         | CL9637Contig1                       | CAACTGGTCGTTTGTCCGTAATG  | CTTGCTCAGACTTCCTAAGAGGC   |
| Methionine Biosynthesis                             | methyltransferase (2.1.1.14, <i>MS2</i> )                                  | CL16257Contig1                      | ATATGCCATGACTGGAGCGATGA  | GGTATTGAAAGCGCAGCACATCA   |
| Alanine, asparate and glutamate biosynthesis        | Omega-amidase, chloroplast (3.5.1.111, <i>NPL3</i> )                       | CL22649Contig1                      | ACTAATCAGGTCACTACGGTCAA  | AGGTCAGGGAAGTTCTAGGGTAT   |
|                                                     | glutamate synthase (1.4.1.13/1.4.1.14, <i>GLTI</i> )                       | CL21Contig13                        | ACATCACGCATAGCATCCATCTC  | GTTCACTGTAATTGTGGTTCCCT   |
| Butanoate metabolism                                | acyl-COA synthetase (6.2.1.2, <i>ACS</i> )                                 | CL263Contig1                        | TGCTGCGTCTTCACTCACTGTTT  | TCCTTGTAAGCCTTATGCCATCC   |
| Arginine and Proline Biosynthesis                   | prolyl 4-hydroxylase (1.14.11.2, <i>P4H</i> )                              | CL32565Contig1                      | AAATCGGACTGGAGGGTGCTGTT  | TGTCTTCGTTGCTGAGTTGAGGG   |
| Flavonoid Biosynthesis                              | anthocyanidin reductase (1.3.1.77, <i>ANR</i> )                            | CL16739Contig1                      | ATCAAGGACATGGCAAGACCAAT  | GAGCAGACCTCACCGATGAACAG   |
|                                                     | leucoanthocyanidin dioxygenase (1.4.11.19, <i>LDOX</i> )                   | CL12667Contig1                      | TGAGCCGCCAAAGGAGAAGATTA  | CAGGCAAAGGACAAGCACTGAGACA |
| Flavone and Flavonol Biosynthesis                   | glucosyltransferase (2.4.1.81, <i>UGT75L12</i> )                           | CL10868Contig1                      | AGAATAACTCGCCGCACAACCTG  | CCATCCTCAAGACCATCAAACCC   |
|                                                     | flavonol 3-O-glucosyltransferase (2.4.1.91, <i>UGT78D2</i> )               | CL11167Contig1                      | CAAACACCTTTACCCAGTCCACC  | GCATCTGAGACCTCGAAATACCA   |
|                                                     | flavonol-3-O-glucoside L-rhamnosyltransferase (2.4.1.159, <i>UGT78D1</i> ) | CL72084Contig1                      | TTCGCAGTCATCAAGATCGTGTC  | TTTGTTC AACGCAACTTCCGTCA  |
